# Supplementary material
Source: PubMed Central journal article supplement (PMC11072233)
Supplement: 18_2020_3699_MOESM1_ESM.pdf [file 18_2020_3699_MOESM1_ESM.pdf]

## Supplemental Appendix

### miR-146a regulates insulin sensitivity *via* NPR3

Roos J <sup>1,2</sup>, Dahlhaus M <sup>1,2</sup>, Funcke JB <sup>1,2,3</sup>, Kustermann M <sup>1</sup>, Strauss G <sup>1</sup>,  
Halbgebauer D <sup>1,2</sup>, Boldrin E <sup>1</sup>, Holzmann K <sup>4</sup>, Möller P <sup>5</sup>, Trojanowski BM <sup>6</sup>,  
Baumann B <sup>6</sup>, Debatin KM <sup>1</sup>, Wabitsch M <sup>1,2</sup>, Fischer-Posovszky P <sup>1,2</sup>

**Short title:** miR-146a and insulin sensitivity

#### **Affiliations:**

<sup>1</sup> Department of Pediatrics and Adolescent Medicine, University Medical Center, Ulm, Germany; <sup>2</sup> Division of Pediatric Endocrinology and Diabetes, Department of Pediatrics and Adolescent Medicine, University Medical Center, Ulm, Germany; <sup>3</sup> Touchstone Diabetes Center, Department of Internal Medicine, The University of Texas Southwestern Medical Center, Dallas, Texas, USA; <sup>4</sup> Core Facility Genomics, Ulm University, Ulm, Germany; <sup>5</sup> Institute of Pathology, University Medical Center, Ulm, Germany; <sup>6</sup> Institute of Physiological Chemistry, Ulm University, Ulm, Germany;

#### **Corresponding author:**

Prof. Dr. Pamela Fischer-Posovszky

Orcid: 0000-0003-3402-9840

Department of Pediatrics and Adolescent Medicine

University Medical Center Ulm

Eythstr. 24

89075 Ulm

Germany

Tel: +49 731 500 57425

Fax: +49 731 500 57246

Email: [pamela.fischer@uniklinik-ulm.de](mailto:pamela.fischer@uniklinik-ulm.de)

## Supplemental Figures

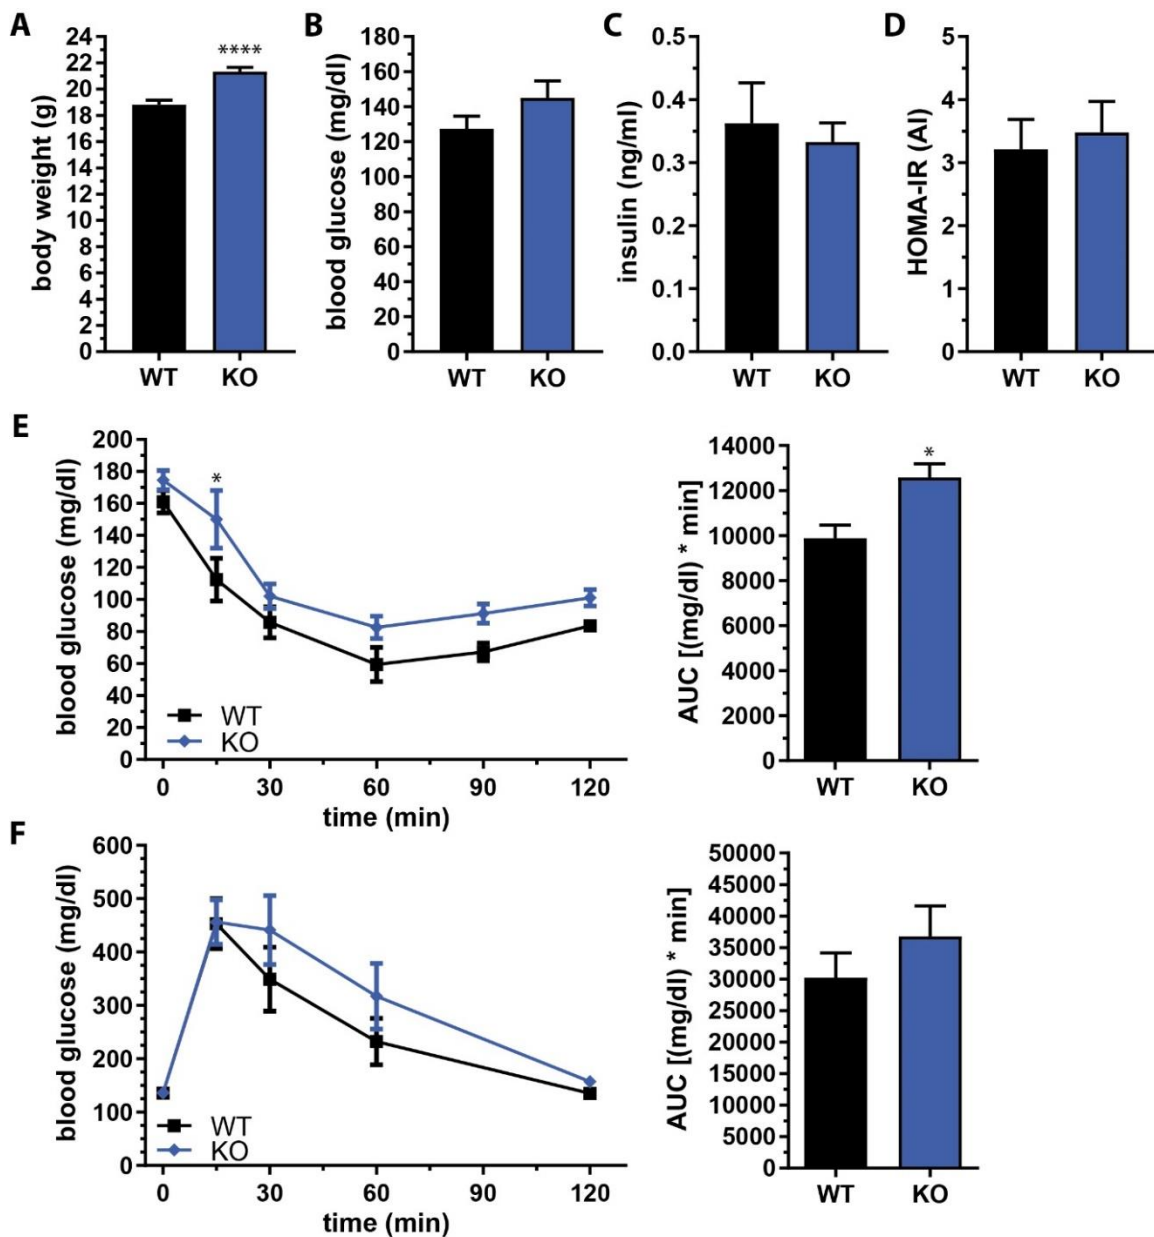

**Figure S1 | Basal metabolic characteristics of miR-146a<sup>-/-</sup> mice.** Female miR-146a<sup>-/-</sup> (KO) and respective control mice (WT) were studied at an age of 10 weeks. **(A)** Body weight, **(B)** fasted blood glucose, **(C)** fasted plasma insulin concentrations, and **(D)** HOMA-IR. **(E)** To assess insulin sensitivity, mice were intraperitoneally injected with 0.75 IU insulin per kg body weight and blood glucose was monitored for 120 min (ITT). Area under the curve (AUC) of ITT. **(F)** To assess glucose tolerance, mice were gavaged with 2.5 g glucose per kg body weight and blood glucose was monitored for 120 min (OGTT). AUC of OGTT. Data are displayed as mean and SEM of 5 animals per group. Statistics: (A-D, E and F AUCs) unpaired t-test, (E and F curves) two-way ANOVA with Bonferroni correction. \*  $p < 0.05$ , \*\*\*\*  $p < 0.0001$ .

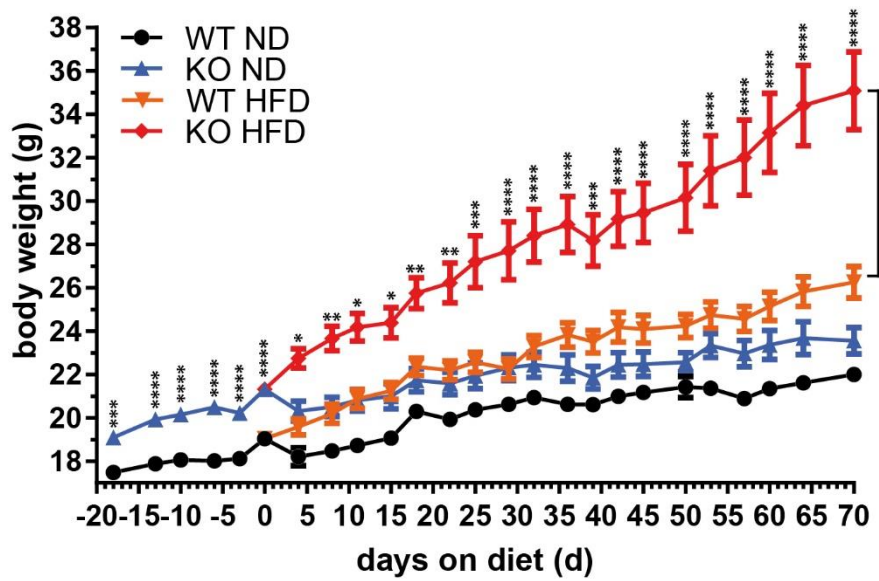

**Figure S2 | Body weight development.** Female miR-146a<sup>-/-</sup> (KO) and respective control mice (WT) at an age of 10 weeks were fed a high fat diet (HFD) or normal diet (ND). Body weight was measured twice a week. Data are displayed as mean and SEM of 10 animals per group. Statistics: two-way ANOVA with Bonferroni correction. \* p<0.05, \* p<0.01, \* p<0.001, \* p<0.0001.

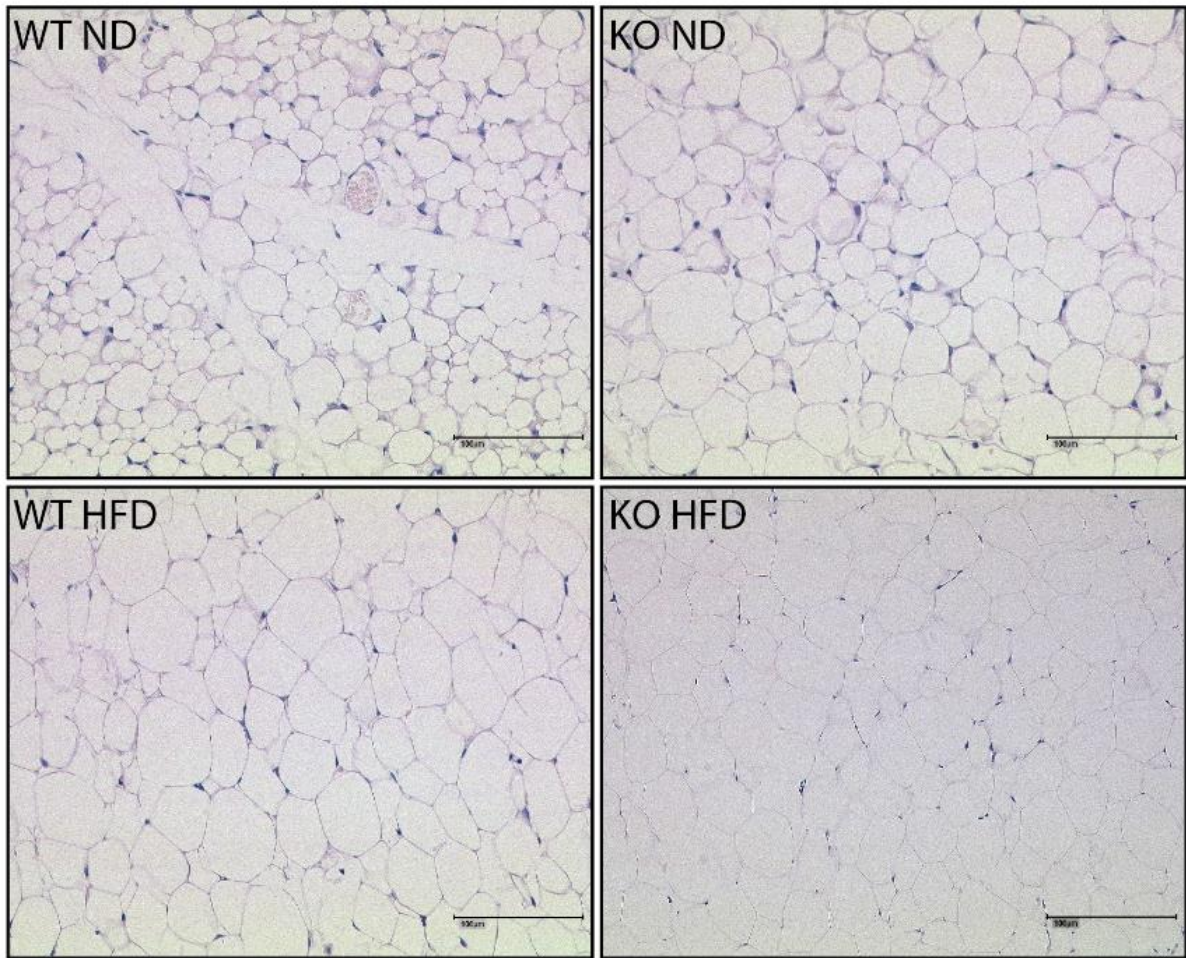

**Figure S3 | Inguinal fat pad histology.** After 10 weeks of high fat diet (HFD) or respective normal diet (ND), inguinal white adipose tissue (iWAT) of miR-146a<sup>-/-</sup> (KO) or respective control mice (WT) was collected and processed for histological analysis. Shown are representative microphotographs of H&E stained iWAT sections.

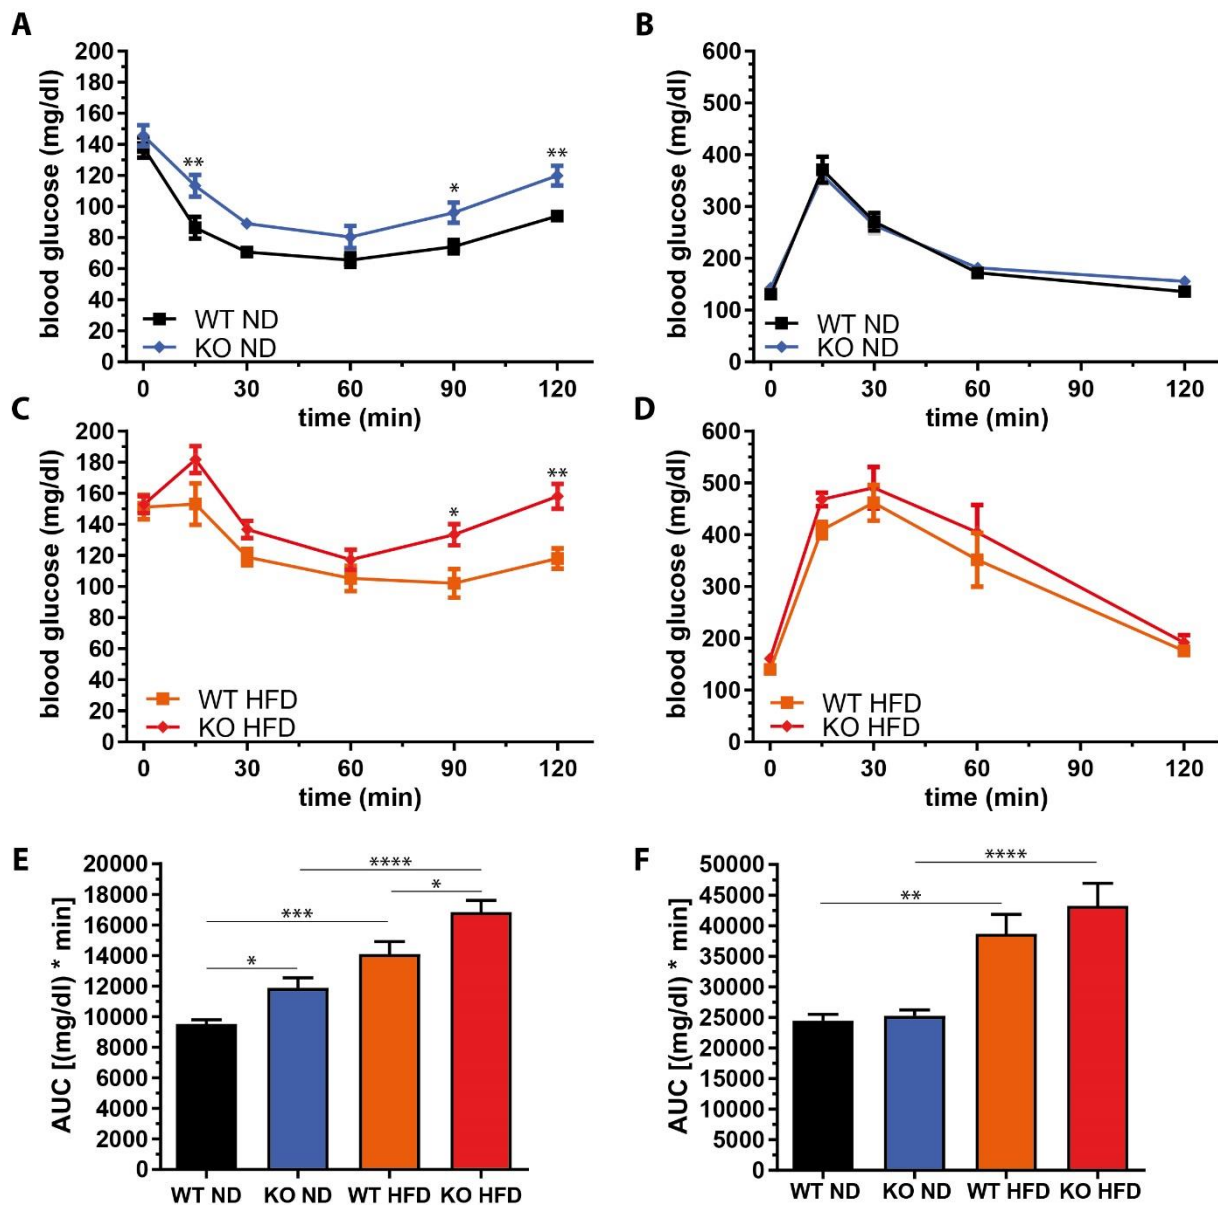

**Figure S4 | Metabolic characterisation of miR-146a<sup>-/-</sup> mice after 5 weeks on a high fat diet.** Female miR-146a<sup>-/-</sup> (KO) and respective control mice (WT) were metabolically characterized at the age of 15 weeks, after 5 weeks high fat (HFD) or respective normal diet (ND). **(A and B)** Insulin tolerance test (ITT) and oral glucose tolerance test (OGTT) in mice fed a ND. **(C and D)** ITT and OGTT in mice fed an HFD. **(E)** Area under the curve (AUC) of ITT. **(F)** AUC of OGTT. Data are displayed as mean and SEM of 10 animals per group. Statistics: (A-D) two-way ANOVA with Bonferroni correction. (E and F) one-way ANOVA with Tukey correction. \* p<0.05, \*\* p<0.01, \*\*\* p<0.001, \*\*\*\* p<0.0001.

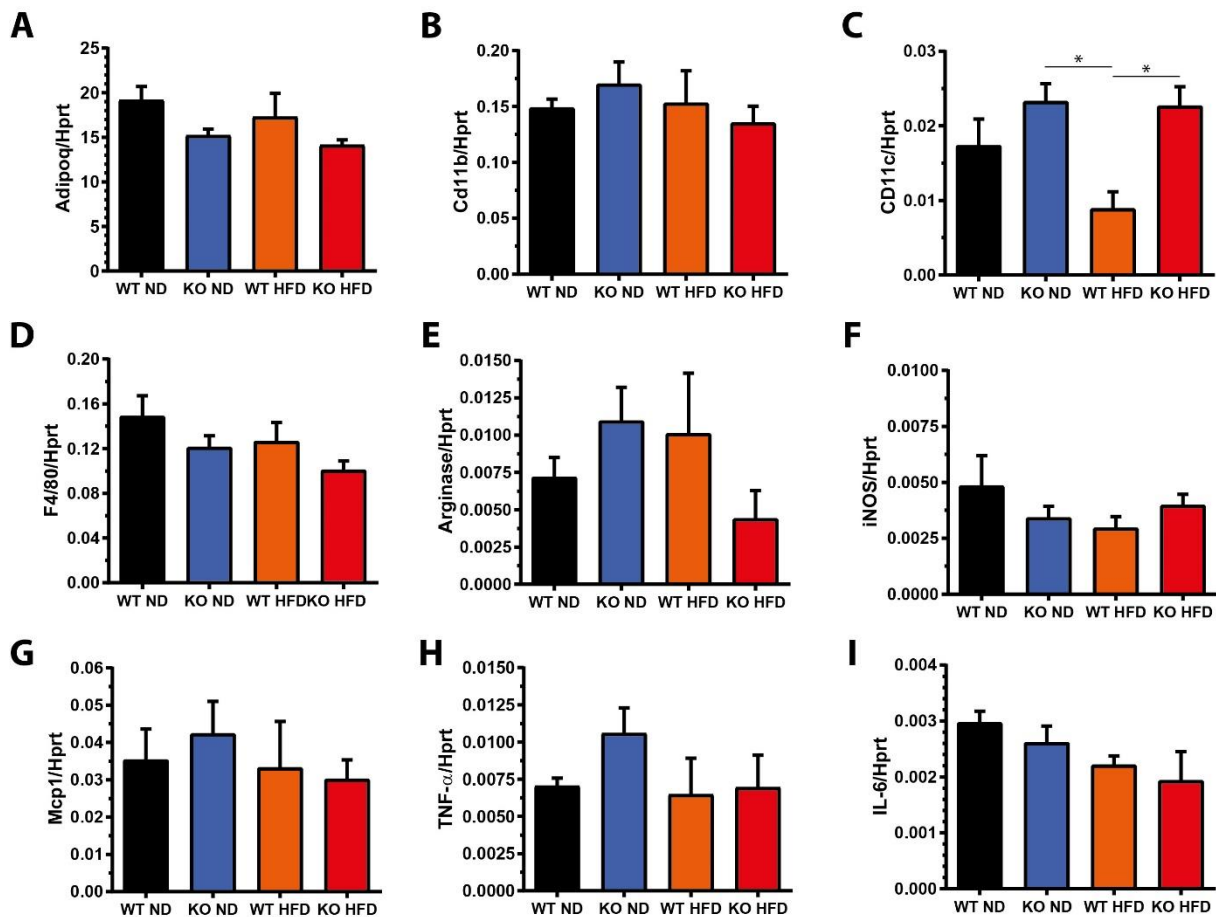

**Figure S5 | Markers for infiltrating immune cells in inguinal adipose tissue.** After 10 weeks of high fat (HFD) or normal diet (ND) miR-146a<sup>-/-</sup> (KO) or respective control mice (WT) were sacrificed, inguinal white adipose tissue (iWAT) was collected and processed for qPCR. mRNA expression is given in relation to Hprt as reference gene ( $2^{-\Delta CT}$ ). **(A)** Adiponectin (Adipoq), **(B)** cluster of differentiation 11b (Cd11b), **(C)** cluster of differentiation 11c (Cd11c), **(D)** EGF-like module-containing mucin-like hormone receptor-like 1 (F4/80), **(E)** arginase, **(F)** iNOS, **(G)** monocyte chemoattractant protein 1 (Mcp-1), **(H)** tumor necrosis factor  $\alpha$  (Tnf- $\alpha$ ), and **(I)** interleukin 6 (IL-6) expression. Data are displayed as mean and SEM of 5 animals per group. Statistics: One-way ANOVA with Tukey correction. \*  $p < 0.05$ , \*\*  $p < 0.01$ .

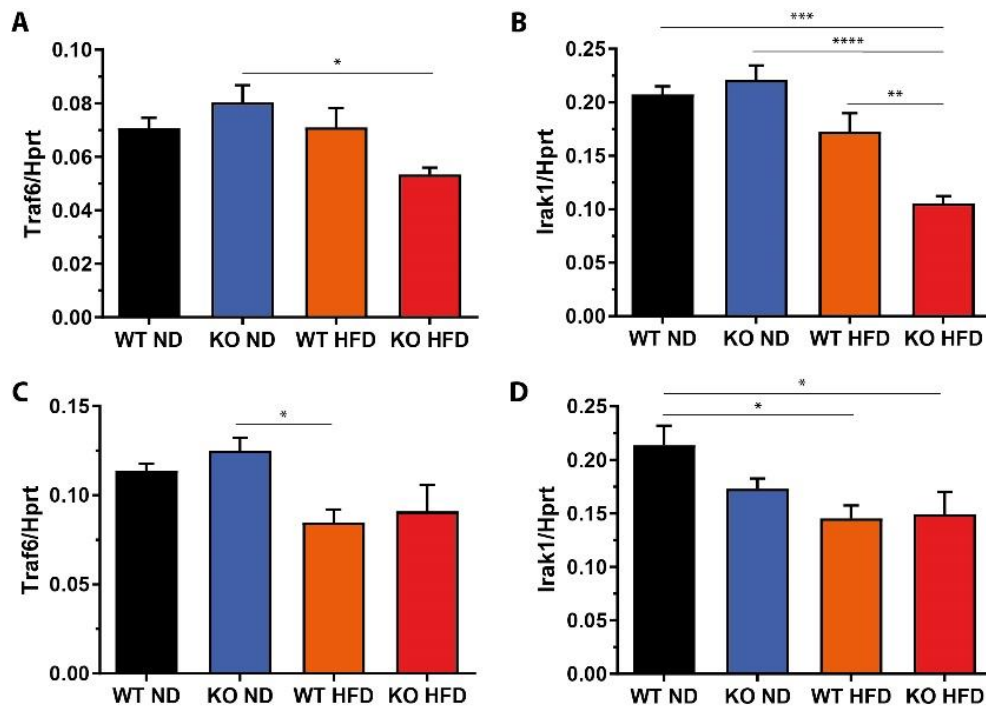

**Figure S6 | Irak1 and Traf6 mRNA expression in gonadal and inguinal fat pads.**

After 10 weeks of high fat diet (HFD) or respective normal diet (ND) gonadal (gWAT) and inguinal white adipose tissue (iWAT) of miR-146a<sup>-/-</sup> (KO) or respective control mice (WT) were collected and processed for qPCR. RNA expression is given in relation to Hprt as the reference gene ( $2^{-\Delta CT}$ ). **(A)** gWAT Traf6 and **(B)** Irak1. **(C)** iWAT Traf6 and **(D)** Irak1. Data are displayed as mean and SEM of 5 animals per group. Statistics: one-way ANOVA with Tukey correction. \*  $p < 0.05$ , \*\*  $p < 0.01$ , \*\*\*  $p < 0.001$ , \*\*\*\*  $p < 0.0001$ .

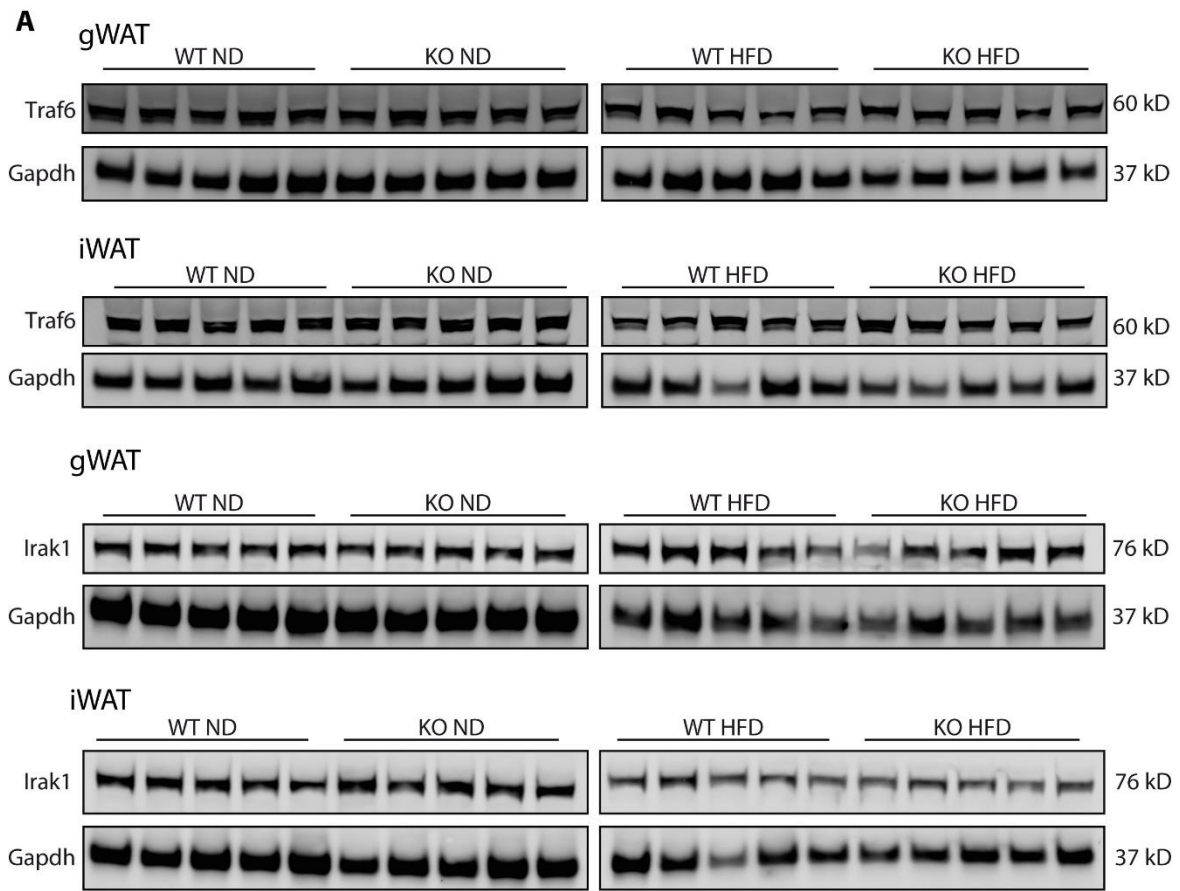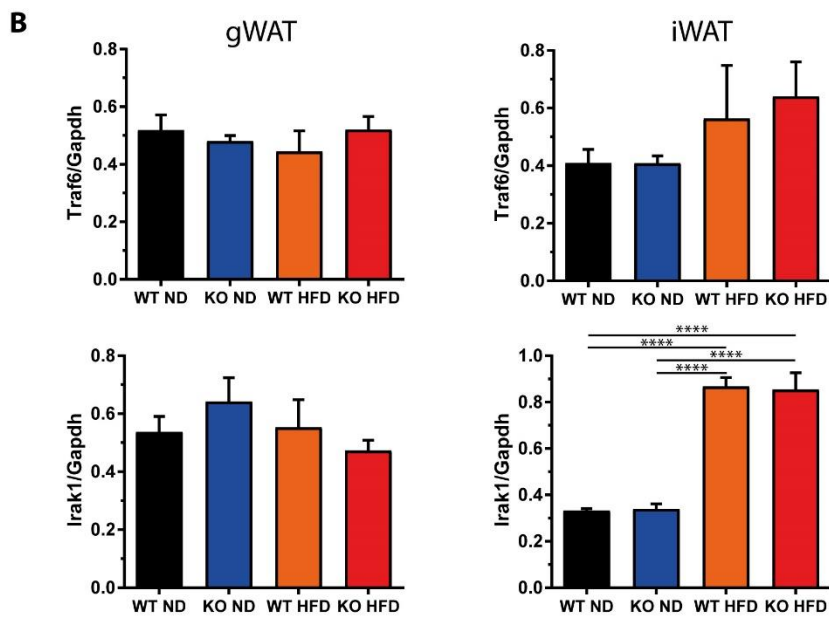

**Figure S7 | Irak1 and Traf6 protein expression in murine WAT. (A)** Irak1 and Traf6 protein expression in inguinal and gonadal white adipose tissue (iWAT, gWAT) of control mice (WT) or miR-146a<sup>-/-</sup> mice (KO) after 10 weeks of normal (ND) or high fat diet (HFD) with **(B)** densitometric analysis of 5 animals per group displayed as mean and SEM. Statistics: one-way ANOVA with Tukey correction, \*\*\*\* p<0.0001.



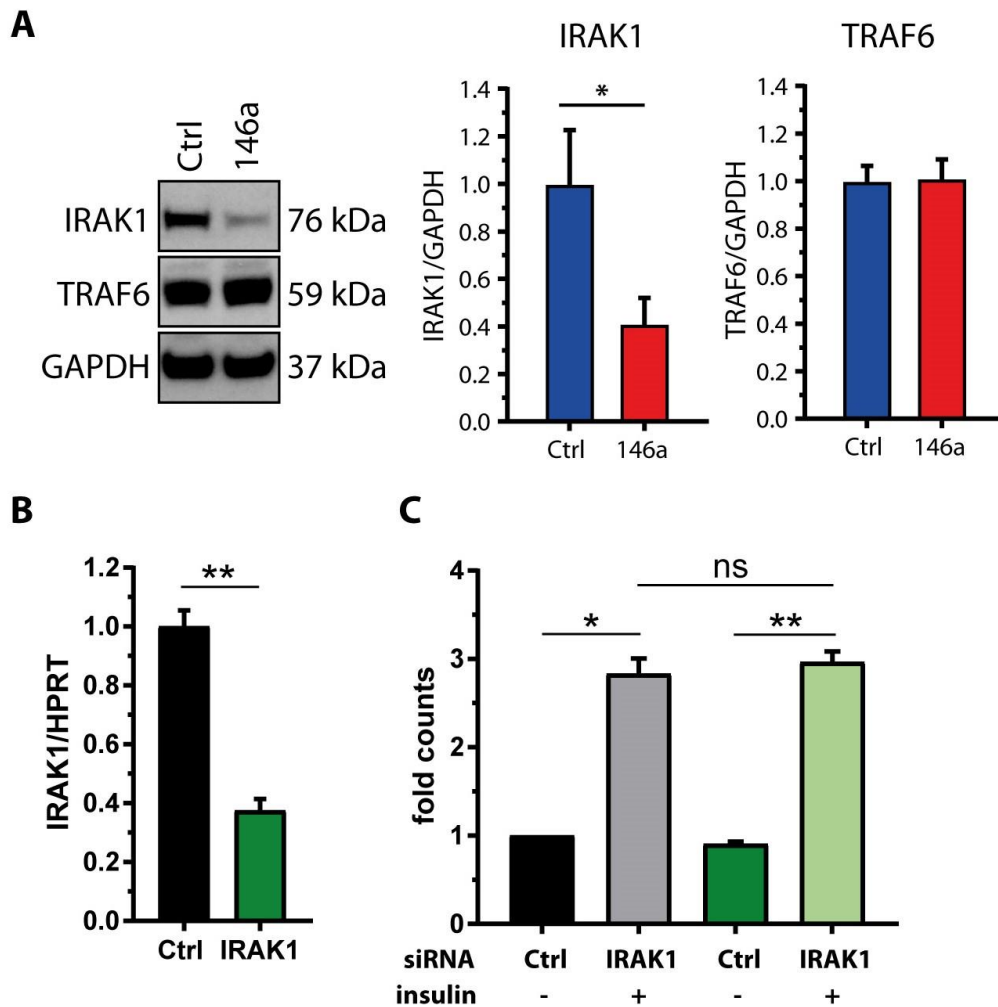

**Figure S8 | IRAK1 is regulated by miR-146a in SGBS adipocytes but does not regulate insulin stimulated glucose uptake (A)** Representative IRAK1 and TRAF6 Western blot of SGBS adipocytes overexpressing miR-146a with densitometric analysis of 3 independent performed experiments displayed as mean and SEM. SGBS adipocytes were transfected with 20 nM control (Ctrl) or IRAK1 siRNA and **(B)** IRAK1 expression was controlled by qPCR and **(C)** glucose uptake experiments were performed with 0 nM and 1 nM insulin. Data are displayed as mean and SEM fold increase to Ctrl siRNA 0 nM insulin. Statistics: (A,B) paired t-test, \*  $p < 0.05$ ; (C) one-way ANOVA with Tukey correction, ns = not significant, \*  $p < 0.05$ , \*\*  $p < 0.01$ .

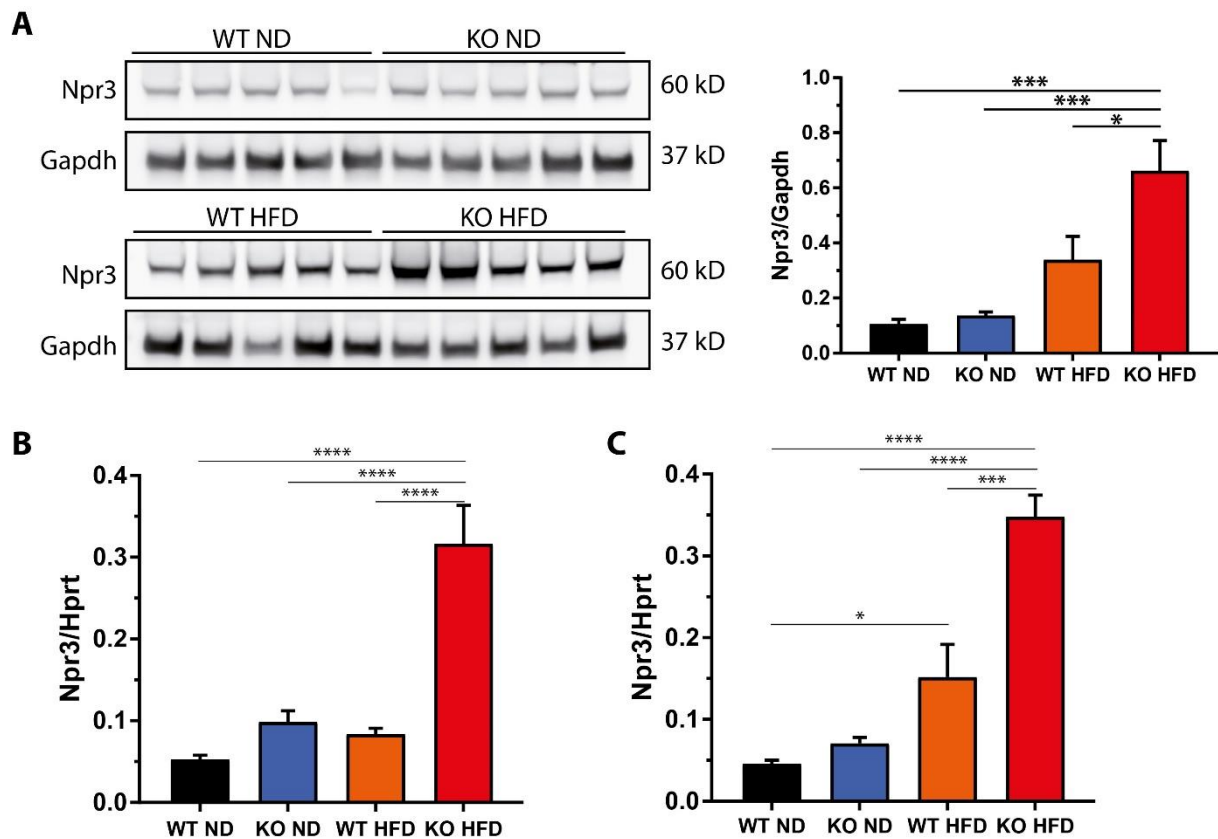

**Figure S9 | NPR3 is a target gene of miR-146a in murine WAT. (A)** Npr3 protein expression in inguinal white adipose tissue (iWAT) of control mice (WT) or miR-146a<sup>-/-</sup> mice (KO) after 10 weeks of normal (ND) or high fat diet (HFD) with densitometric analysis of 5 animals per group displayed as mean and SEM. **(B)** NPR3 mRNA expression in gonadal WAT (gWAT) and **(C)** iWAT. Statistics: one-way ANOVA with Tukey correction, \* p<0.05, \*\*\* p<0.001, \*\*\*\* p<0.0001.

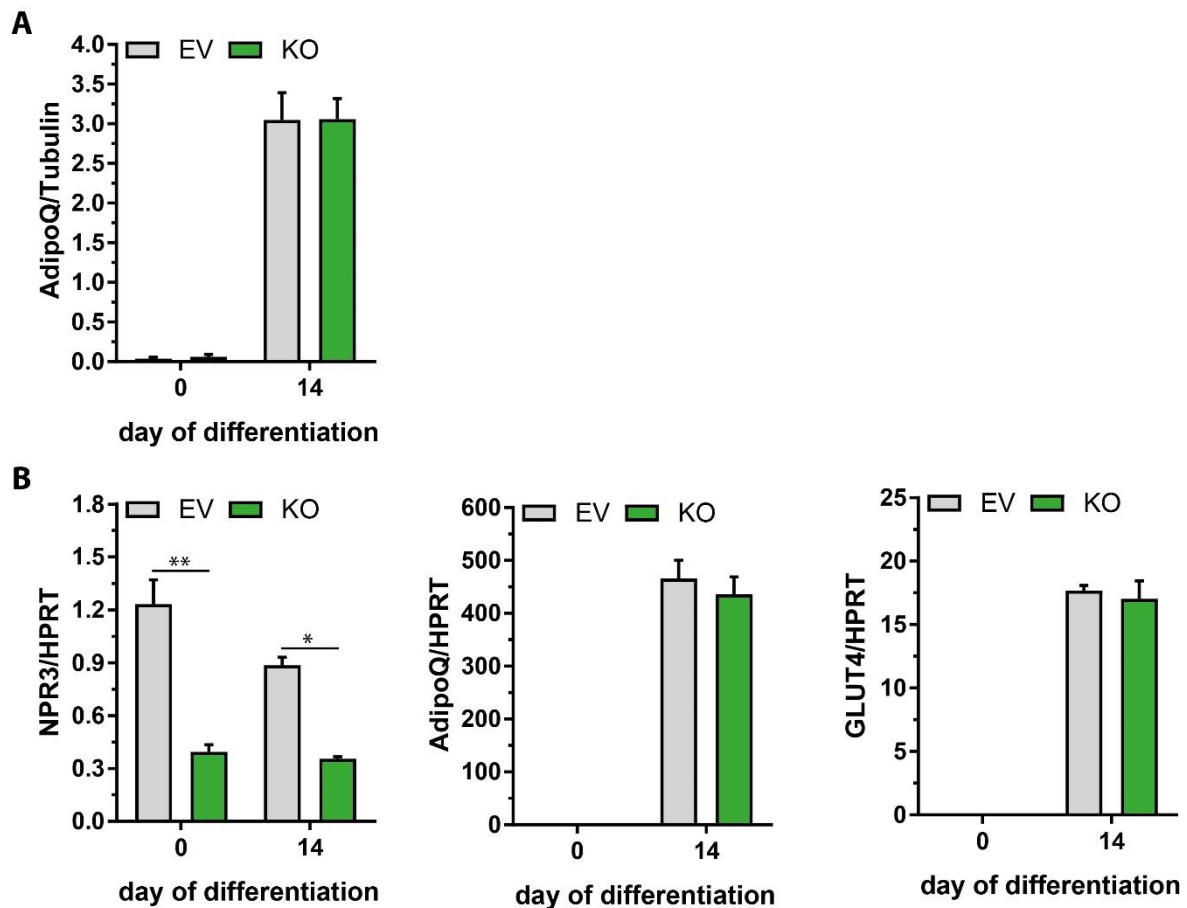

**Figure S10 | NPR3 ablation does not affect adipogenic differentiation. (A)** Densitometric analysis for adiponectin Western Blots in pre-adipocytes (d0) and adipocytes (d14) displayed as mean and SEM of 4 independent replicates. **(B)** NPR3, adiponectin (AdipoQ), and glucose transporter 4 (GLUT4) mRNA expression in pre-adipocytes and adipocytes of control (EV) and NPR3 KO cells (KO). Data are displayed as mean and SEM of 4 independent experiments. Statistics: one-way ANOVA with Tukey correction, \*  $p < 0.05$ , \*\*  $p < 0.01$ .

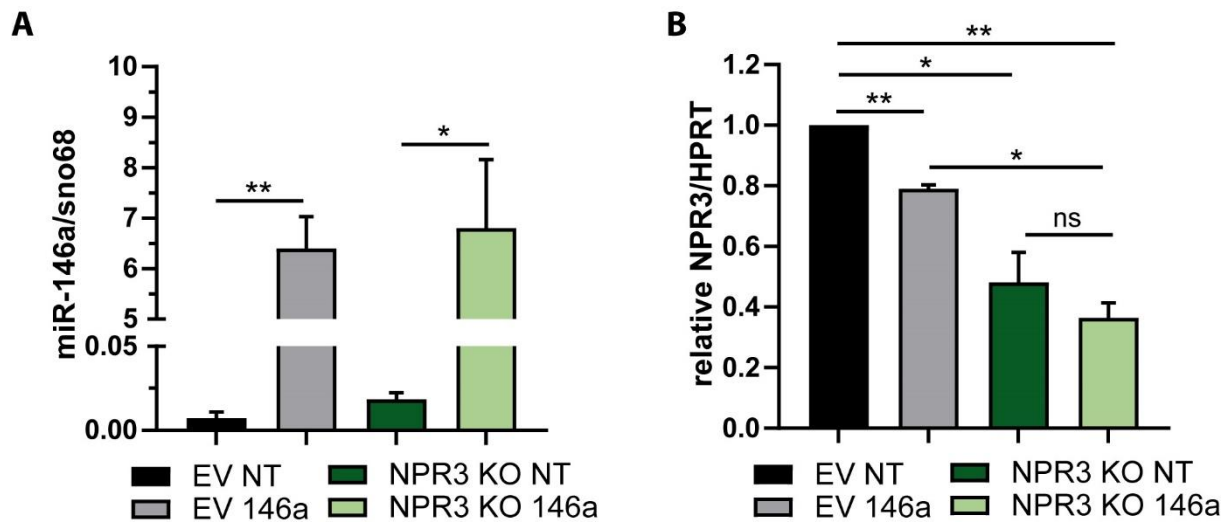

**Figure S11 | miR-146a and NPR3 mRNA levels of NPR3 KO cells after NT and control (NT) and miR-146a mimic transfection.** Control (EV) or NPR3 KO cells were transfected with 20 nM non-targeting (NT) or miR-146a mimic and **(A)** miR-146a expression and **(B)** NPR3 mRNA expression was quantified by qPCR in mature adipocytes. Data are displayed as mean and SEM of 3 independent experiments with sno68 or HPRT as reference gene. Statistics: one-way ANOVA with Tukey correction, ns= not significant, \*  $p < 0.05$ , \*\*  $p < 0.01$ .

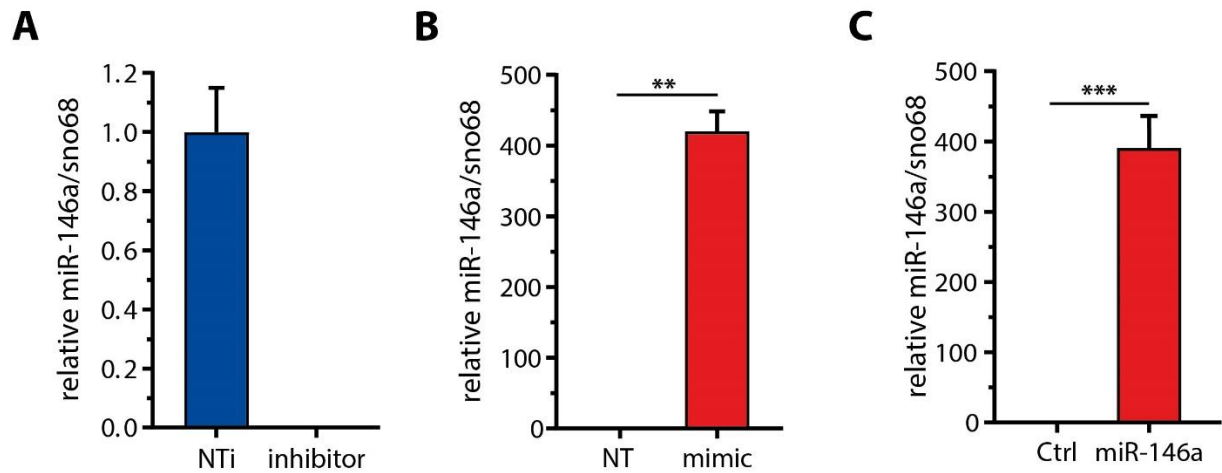

**Figure S12 | miR-146a levels.** Transfection efficiency and miR-146a overexpression were measured by qPCR and given as  $2^{-\Delta\Delta CT}$  with sno68 as the reference gene. **(A)** miR-146a inhibitor (50 nM) or inhibitor control (NTi, 50 nM) transfected adipocytes. **(B)** miR-146a mimic (20 nM) or control (NT, 20 nM) transfected adipocytes. **(C)** Adipocytes stably overexpressing miR-146a or non-target control (Ctrl). Data are displayed as mean and SEM of 4 (A) or 3 (B and C) independent experiments. Statistics: paired t-test, \*  $p < 0.05$ , \*\*  $p < 0.01$ .

**Supplemental Table 1 | Number of differentially expressed genes**

|               | <b>WT ND</b> | <b>WT HFD</b> | <b>KO ND</b> | <b>KO HFD</b> |
|---------------|--------------|---------------|--------------|---------------|
| <b>WT ND</b>  | <b>X</b>     | <b>458</b>    | <b>68</b>    | <b>/</b>      |
| <b>WT HFD</b> | <b>458</b>   | <b>X</b>      | <b>/</b>     | <b>516</b>    |
| <b>KO ND</b>  | <b>68</b>    | <b>/</b>      | <b>X</b>     | <b>748</b>    |
| <b>KO HFD</b> | <b>/</b>     | <b>516</b>    | <b>748</b>   | <b>X</b>      |

**Supplemental Table 2 | Murine qPCR primer pairs**

| <b>target gene</b> | <b>primer</b> | <b>sequence 5'&gt;3'</b>       |
|--------------------|---------------|--------------------------------|
| <b>Adipoq</b>      | forward       | GTTCTCTTAATCCTGCCAGTCATGCC     |
|                    | reverse       | GGACCAAGAAGACCTGCATCTCCTTTCTC  |
| <b>Arginase</b>    | forward       | TCCTTTCAAATTGTGAAGAACCCACGGTC  |
|                    | reverse       | AGAATCCTGGTACATCTGGGAACCTTTCCT |
| <b>Cd11b</b>       | forward       | AGGCTCTCAGAGAATGTCCTCAG        |
|                    | reverse       | TCCATCACAGTTGAGACAAACTCC       |
| <b>Cd11c</b>       | forward       | CAGTCTGGCAGATGTGGCTA           |
|                    | reverse       | GGATCTGGGATGCTGAAATC           |
| <b>F4/80</b>       | forward       | CTTTGGCTATGGGCTTCCAGTC         |
|                    | reverse       | GCAAGGAGGACAGAGTTTATCGTG       |
| <b>Glut4</b>       | forward       | TGAGCTGAAGGATGAGAAACGGAAGTTGGA |
|                    | reverse       | CTAAGAGCACCGAGACCAACGTGAAGACC  |
| <b>I-Ab</b>        | forward       | GGTGTGAGTCCTGGTGA CTG          |
|                    | reverse       | GTACACGAAATGCCTTTCGGAG         |
| <b>Il-6</b>        | forward       | GATGGATGCTACCAA ACTGGA         |
|                    | reverse       | TCTGAAGGACTCTGGCTTTG           |
| <b>iNos</b>        | forward       | AGCAATGGGCAGACTCTGAAGAAATCTC   |
|                    | reverse       | ATGTTTGCTTCGGACATCAAAGGTCTCAC  |
| <b>Npr3</b>        | forward       | GGTGGCCTACGAAGACTCG            |
|                    | reverse       | CCAGGATGAGATCCGGCTTG           |
| <b>Mcp-1</b>       | forward       | AGGTCCCTGTCATGCTTCTG           |
|                    | reverse       | GGGATCATCTTGCTGGTGAA           |
| <b>Mpo</b>         | forward       | AGTTGTGCTGAGCTGTATGGA          |
|                    | reverse       | GCTCCGCTTGATGCTTTTCTC          |
| <b>SiglecF</b>     | forward       | GCTCAGTGT CATCTATGCTCCA        |
|                    | reverse       | CATACAGACCAGGCTCAGGGA          |
| <b>Tnf-α</b>       | forward       | CCAGACCCTCACACTCAGATCATCTTCTC  |
|                    | reverse       | CTAGTTGGTTGTCTTTGAGATCCATGCCGT |

**Supplemental Table 3 | QIAGEN miScript Primer assays**

| <b>primer assay</b>  | <b>target ncRNA</b> | <b>category number</b> |
|----------------------|---------------------|------------------------|
| <b>Hs-SNORD68_11</b> | SNO68 snoRNA        | MS00033712             |
| <b>Hs-miR-146a_1</b> | hsa-miR-146a-5p     | MS00003535             |
| <b>Mm_miR-146_1</b>  | mmu-miR-145a-5p     | MS00001638             |

**Supplemental Table 4 | Human qPCR primer pairs**

| target gene   | primer  | sequence 5'>3'           |
|---------------|---------|--------------------------|
| <b>AdipoQ</b> | forward | GGCCGTGATGGCAGAGAT       |
|               | reverse | CCTTCAGCCCCGGGTACT       |
| <b>FOLH1</b>  | forward | ACACAGATACCACATTTAGCAGG  |
|               | reverse | TTTGGGTAGGACAACAGGACA    |
| <b>GLUT4</b>  | forward | TTCCAACAGATAGGCTCCGAAG   |
|               | reverse | AAGCACCGCAGAGAACACAG     |
| <b>MEST</b>   | forward | AGTTGTGCTTTTACACGGTTTTTC |
|               | reverse | CAAGGGCAATCACCCGATGAA    |
| <b>NPR3</b>   | forward | ACAGCAGACTTGGAACAGAAC    |
|               | reverse | AATCCCATATCGGTCTCCGT     |
| <b>SLC4A1</b> | forward | GGTGATGGACGAAAAGAACCA    |
|               | reverse | AAGACTCTACGCAGCTCTAGG    |

**SupplementalTable 5 | Antibodies for flow cytometry**

| epitope                      | clone       | fluorochrome | company                 | dilution |
|------------------------------|-------------|--------------|-------------------------|----------|
| <b>CD11b</b>                 | M1/70       | APC eFl780   | eBioscience             | 1:150    |
| <b>CD11c</b>                 | N418        | PE-Cy7       | ThermoFisher Scientific | 1:1000   |
| <b>CD19</b>                  | 1D3         | PE           | BD                      | 1:600    |
| <b>CD3</b>                   | 17A2        | AF700        | ThermoFisher Scientific | 1:40     |
| <b>CD4</b>                   | RM4-5       | APC-eFl780   | ThermoFisher Scientific | 1:300    |
| <b>CD45</b>                  | 30-F11      | AF700        | BioLegend               | 1:400    |
| <b>CD8</b>                   | 53-6.7      | PE-Cy7       | ThermoFisher Scientific | 1:1500   |
| <b>F4/80</b>                 | BM6         | FITC         | ThermoFisher Scientific | 1:50     |
| <b>Gr-1</b>                  | RB6-8C5     | eFl450       | ThermoFisher Scientific | 1:100    |
| <b>I-Ab</b>                  | M5/114.15.2 | APC          | ThermoFisher Scientific | 1:2000   |
| <b>NK1.1</b>                 | PK136       | PE           | ThermoFisher Scientific | 1:50     |
| <b>SiglecF</b>               | E50-2440    | PE           | BD                      | 1:50     |
| <b>TCR<math>\beta</math></b> | H57-597     | APC          | ThermoFisher Scientific | 1:200    |
